# Supplementary material
Source: Research Square preprint supplement (doi:10.21203/rs.3.rs-9047045/v1)
Supplement: Supplementary file 1 [file e673a17908d53e974e08c2f6.pdf]

## CARE Checklist of information to include when writing a case report

| Topic                               | Item | Checklist item description                                                                              | Reported on Page / Line                                                                                |
|-------------------------------------|------|---------------------------------------------------------------------------------------------------------|--------------------------------------------------------------------------------------------------------|
| <b>Title</b>                        | 1    | The diagnosis or intervention of primary focus followed by the words “case report”.                     | Page 1, Lines 1–2                                                                                      |
| <b>Key Words</b>                    | 2    | 2 to 5 key words that identify diagnoses or interventions in this case report, including “case report”. | Page 3, Lines 2–4                                                                                      |
| <b>Abstract<br/>(no references)</b> | 3a   | Introduction: What is unique about this case and what does it add to the scientific literature?         | Page 1, Lines 19–22;<br>Page 2, Lines 1–2                                                              |
|                                     | 3b   | Main symptoms and/or important clinical findings.                                                       | Page 2, Lines 3–5                                                                                      |
|                                     | 3c   | The main diagnoses, therapeutic interventions, and outcomes.                                            | Page 2, Lines 5–17                                                                                     |
|                                     | 3d   | Conclusion—What is the main “take-away” lesson(s) from this case?                                       | Page 2, Lines 18–22                                                                                    |
| <b>Introduction</b>                 | 4    | One or two paragraphs summarizing why this case is unique (may include references).                     | Page 3, Lines 6–24;<br>Page 4, Lines 1–17                                                              |
| <b>Patient Information</b>          | 5a   | De-identified patient specific information.                                                             | Page 4, Lines 19–20                                                                                    |
|                                     | 5b   | Primary concerns and symptoms of the patient.                                                           | Page 4, Lines 20–25;<br>Page 5, Lines 1–4                                                              |
|                                     | 5c   | Medical, family, and psycho-social history including relevant genetic information.                      | Not reported                                                                                           |
|                                     | 5d   | Relevant past interventions with outcomes.                                                              | Not reported                                                                                           |
| <b>Clinical Findings</b>            | 6    | Describe significant physical examination (PE) and important clinical findings.                         | Page 5, Lines 11–24;<br>Page 6, Line 1 (Table 1)                                                       |
| <b>Timeline</b>                     | 7    | Historical and current information from this episode of care organized as a timeline.                   | Page 5, Lines 5–10;<br>Page 5, Lines 11–24;<br>Page 6, Line 1 (Table 1)                                |
| <b>Diagnostic Assessment</b>        | 8a   | Diagnostic testing (such as PE, laboratory testing, imaging, surveys).                                  | Page 4, Lines 22–25;<br>Page 5, Lines 1–1;<br>Page 5, Lines 11–24;<br>Page 6, Line 1; Page 7, Figure 1 |
|                                     | 8b   | Diagnostic challenges (such as access to testing, financial, or cultural).                              | Not reported                                                                                           |
|                                     | 8c   | Diagnosis (including other diagnoses considered).                                                       | Page 4, Lines 22–25;<br>Page 5, Line 1                                                                 |
|                                     | 8d   | Prognosis (such as staging in oncology) where applicable.                                               | Page 5, Line 1; Page 5, Lines 11–24                                                                    |
| <b>Therapeutic Intervention</b>     | 9a   | Types of therapeutic intervention (such as pharmacologic, surgical, preventive, self-care).             | Page 5, Lines 5–10;<br>Page 5, Lines 11–24;<br>Page 6, Line 1 (Table 1)                                |
|                                     | 9b   | Administration of therapeutic intervention (such as                                                     | Page 5, Lines 11–24;                                                                                   |

|                               |     |                                                                                                         |                                                                                        |
|-------------------------------|-----|---------------------------------------------------------------------------------------------------------|----------------------------------------------------------------------------------------|
|                               |     | dosage, strength, duration).                                                                            | Page 6, Lines 1–1 (Table 1)                                                            |
|                               | 9c  | Changes in therapeutic intervention (with rationale).                                                   | Page 5, Lines 5–8                                                                      |
| <b>Follow-up and Outcomes</b> | 10a | Clinician and patient-assessed outcomes (if available).                                                 | Page 2, Lines 14–17; Page 6, Line 1 (Table 1)                                          |
|                               | 10b | Important follow-up diagnostic and other test results.                                                  | Page 5, Lines 11–24; Page 6, Line 1 (Table 1)                                          |
|                               | 10c | Intervention adherence and tolerability (How was this assessed?).                                       | Page 2, Lines 14–17                                                                    |
|                               | 10d | Adverse and unanticipated events.                                                                       | Page 2, Lines 14–17; Page 6, Line 1 (Table 1)                                          |
| <b>Discussion</b>             | 11a | A scientific discussion of the strengths AND limitations associated with this case report.              | Page 7, Lines 9–18; Pages 8–15, Discussion section (limitations not explicitly stated) |
|                               | 11b | Discussion of the relevant medical literature with references.                                          | Page 7, Lines 10–18; Pages 8–15                                                        |
|                               | 11c | The scientific rationale for any conclusions (including assessment of possible causes).                 | Pages 8–15                                                                             |
|                               | 11d | The primary “take-away” lessons of this case report (without references) in a one paragraph conclusion. | Page 15, Lines 5–9                                                                     |
| <b>Patient Perspective</b>    | 12  | The patient should share their perspective in one to two paragraphs on the treatment(s) they received.  | Not reported                                                                           |
| <b>Informed Consent</b>       | 13  | Did the patient give informed consent? Please provide if requested.                                     | Yes — Page 16, Lines 1–6                                                               |
